# Supplementary material
Source: Springer Nature journal article supplement (https://www.springermedizin.de/resource/supplementary/12885_2010_2367_MOESM16_ESM.pdf/9461124)

**Apoptotic fraction by the Annexin V assay**

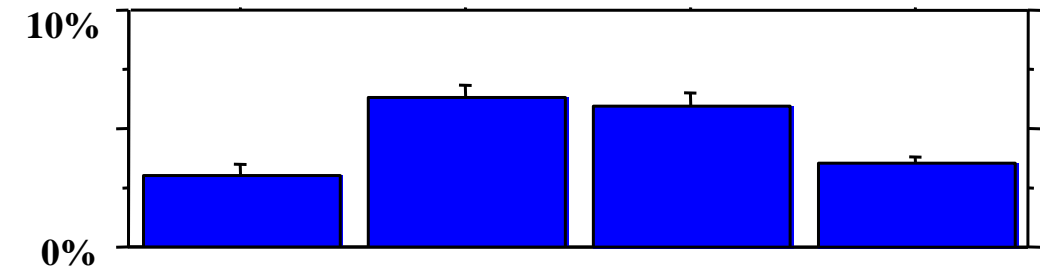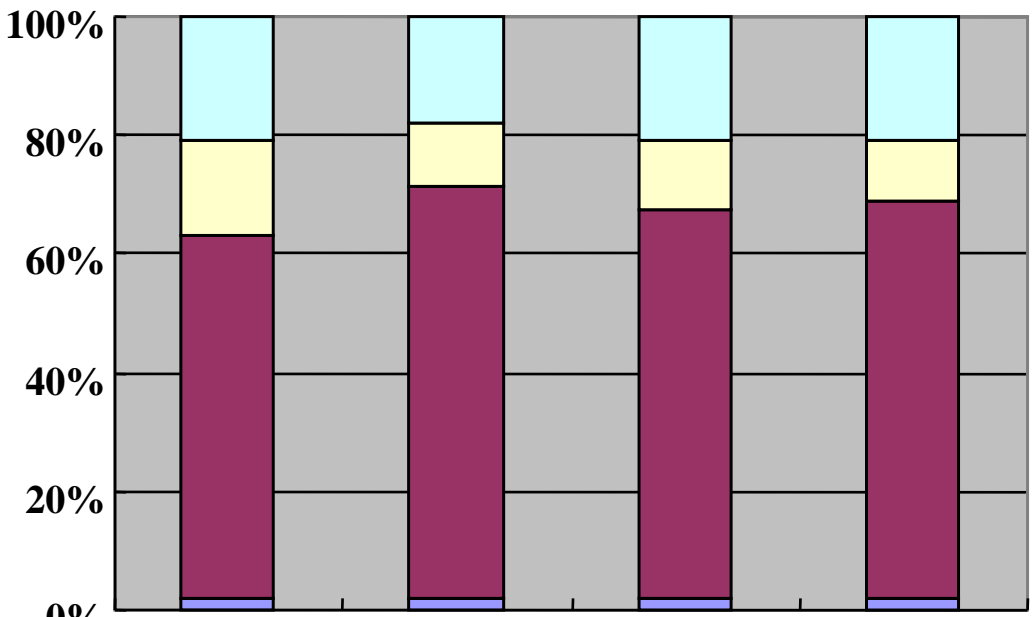

- G2M
- S
- G0/G1
- Sub G1

**Control    0.1 μM    0.1 μM    Dasatinib +**  
**Dasatinib    Eto    Eto**

Supplement: MOESM16 [file 9461124]
